# Supplementary material for: Insulator-to-metal transition, magnetic anisotropy, and improved TC in a ferrimagnetic La2CoIrO6: strain influence
Source: Royal Society of Chemistry journal article supplement (doi:10.1039/d3cp04755e), 2024-01-01
Supplement: d3cp04755e1.pdf [file d3cp04755e1.pdf]

## Supporting Information

### Insulator-to-Metal Transition, Magnetic Anisotropy, and Improved $T_C$ in a Ferrimagnetic $\text{La}_2\text{CoIrO}_6$ : Strain Influence

S. Nazir\*

<sup>1</sup>*Department of Physics, University of Sargodha, 40100 Sargodha, Pakistan*

---

\* Electronic address: [safdar.nazir@uos.edu.pk](mailto:safdar.nazir@uos.edu.pk), Tel: +92-334-971-9060

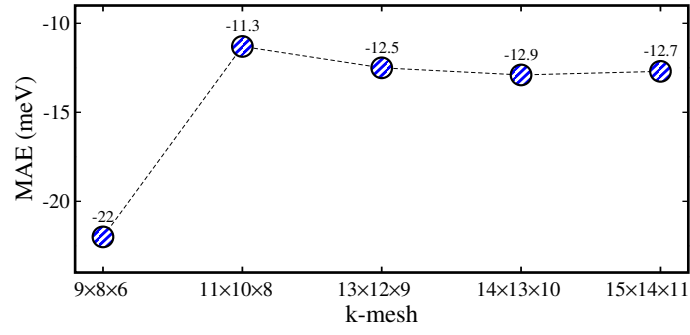

FIG. 1S: (Color online) Computed magnetocrystalline anisotropy energy (MAE) as a function of various k-meshes in the  $\text{La}_2\text{CoIrO}_6$  double perovskite oxide.

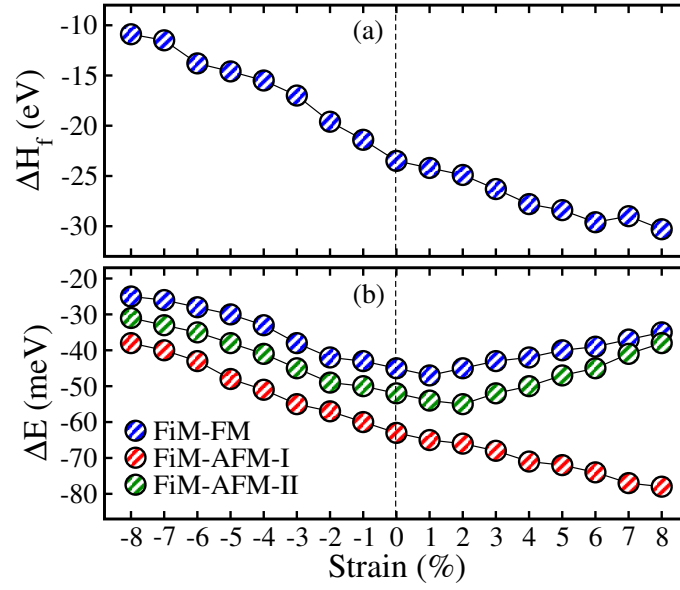

FIG. 2S: (Color online) Computed (a) enthalpies of formation ( $\Delta H_f$ ) and (b) total energy differences ( $\Delta E$ ) of ferrimagnetic (FiM) with ferromagnetic (FM)/anti-ferromagnetic-I (AFM-I)/(AFM-II) spin ordering with respect to  $\pm 8\%$  biaxial ( $[110]$ ) strain along the  $ab$ -plane in the  $\text{La}_2\text{CoIrO}_6$  double perovskite oxide.

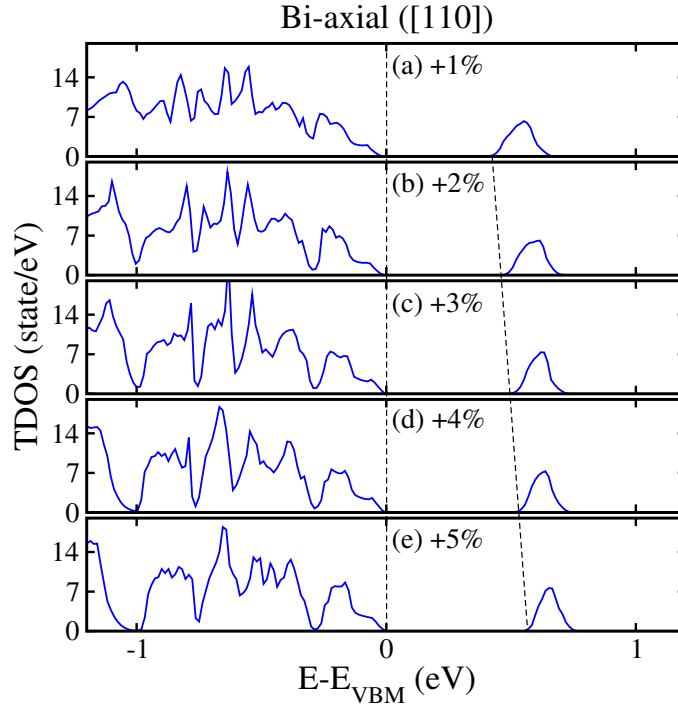

FIG. 3S: (Color online) Computed GGA+ $U$ +SOC spin non-degenerate total density of states for (a) +1%, (b) +2%, (c) +3%, (d) +4%, and (e) +5% biaxial ([110]) tensile strains along the  $ab$ -plane in the stable ferrimagnetic spin-ordering of  $\text{La}_2\text{CoIrO}_6$  double perovskite oxide.

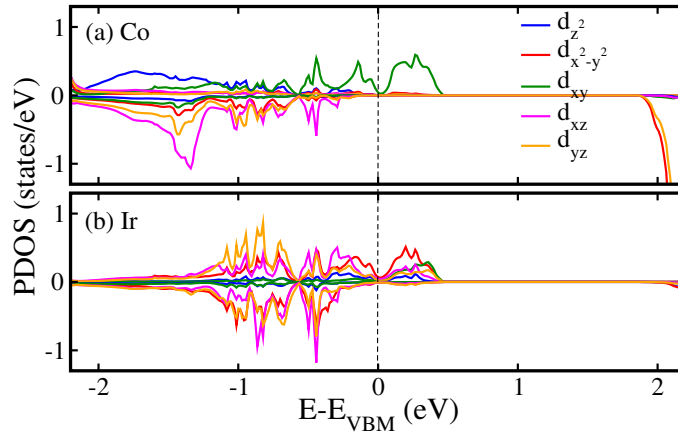

FIG. 4S: (Color online) Computed GGA+ $U$ +SOC spin non-degenerate 3 $d$ -orbital resolved partial density of states (PDOS) for a critical  $-6\%$  biaxial ([110]) compressive strain along the  $ab$ -plane of (a) Co and (b) Ir ions in the stable ferrimagnetic spin-ordering of  $\text{La}_2\text{CoIrO}_6$  double perovskite oxide.
